# Supplementary material for: Development of a Real-Time TaqMan RT-PCR Assay for the Detection of NADC34-like Porcine Reproductive and Respiratory Syndrome Virus
Source: MDPI journal article supplement (doi:10.3390/vetsci10040279), 2023-04-06
Supplement: s1 [file s1]

## Supplementary Materials

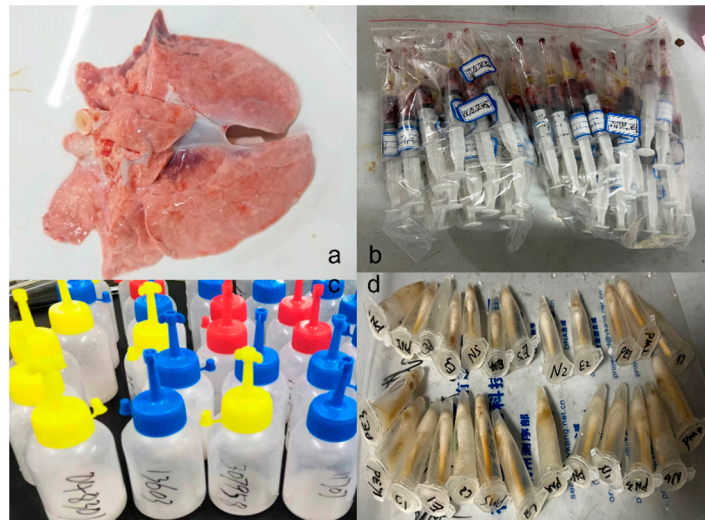

**Figure S1.** Several samples were collected with suspected PRRSV infection; (a) Collected pig's lung (b) Collected pig's blood (c) Collected pig essence (d) Collected saliva swabs

**Table S1.** Ct values and viral copies of positive clinical samples.

| Year | Positive samples | Ct values | viral copies | Co-infected samples                |
|------|------------------|-----------|--------------|------------------------------------|
| 2018 | N30-1            | 30.21     | 1125         | N30-1/HP-3                         |
|      | N30-2            | 28.13     | 4022         |                                    |
|      | HP-1             | 19.74     | 35862067     |                                    |
|      | HP-2             | 18.46     | 78814659     |                                    |
|      | HP-3             | 24.61     | 1792833      |                                    |
|      | HP-4             | 27.89     | 238362       |                                    |
|      | HP-5             | 31        | 35185        |                                    |
|      | HP-6             | 25.19     | 1254827      |                                    |
|      | HP-7             | 32.13     | 17557        |                                    |
|      | HP-8             | 17.49     | 143138814    |                                    |
|      | HP-9             | 15.88     | 385383989    |                                    |
| 2019 | HP-10            | 16.98     | 195889770    | N30-1/HP-10,N30-4/HP-10,N30-3/HP-6 |
|      | HP-11            | 21.22     | 14428812     |                                    |
|      | N30-1            | 31.29     | 580          |                                    |
|      | N30-2            | 19.74     | 686108       |                                    |
|      | N30-3            | 16.86     | 4004551      |                                    |
|      | N30-4            | 27.63     | 5463         |                                    |
|      | N30-5            | 24.44     | 38553        |                                    |
|      | HP-1             | 25.49     | 20264        |                                    |
|      | HP-2             | 18.52     | 75958622     |                                    |
|      | HP-3             | 18.47     | 78331302     |                                    |
|      | HP-4             | 19.39     | 44477790     |                                    |
|      | HP-5             | 22.99     | 4856773      |                                    |
|      | HP-6             | 34.01     | 5523         |                                    |
|      | HP-7             | 23.84     | 2879104      |                                    |
|      | HP-8             | 21.68     | 10872627     |                                    |
|      | HP-9             | 31.06     | 33910        |                                    |
|      | HP-10            | 14.01     | 1217567144   |                                    |
|      | HP-11            | 26.58     | 533610       |                                    |
|      | HP-12            | 29.47     | 90181        |                                    |
| 2020 | HP-13            | 16.77     | 222903293    |                                    |
|      | HP-14            | 27.98     | 225524       |                                    |
|      | N30-1            | 21.64     | 214259       |                                    |
|      | N30-2            | 24.79     | 31114        |                                    |
|      | N30-3            | 33.41     | 158          |                                    |
|      | N30-4            | 33.25     | 175          |                                    |

|      |        |       |            |                                                          |
|------|--------|-------|------------|----------------------------------------------------------|
| 2021 | N30-5  | 19.81 | 657311     | N30-2/HP-11,N30-5/HP-10,N30-4/HP-7,N30-6/HP-4,N30-7/HP-8 |
|      | N30-6  | 19.93 | 610727     |                                                          |
|      | N30-7  | 26.66 | 9896       |                                                          |
|      | HP-1   | 17.53 | 139659602  |                                                          |
|      | HP-2   | 17.98 | 105887911  |                                                          |
|      | HP-3   | 19.01 | 56190907   |                                                          |
|      | HP-4   | 24.37 | 2078067    |                                                          |
|      | HP-5   | 20.09 | 28915282   |                                                          |
|      | HP-6   | 19.21 | 49685878   |                                                          |
|      | HP-7   | 19.56 | 40061304   |                                                          |
|      | HP-8   | 24.12 | 2423544    |                                                          |
|      | HP-9   | 35.01 | 2986       |                                                          |
|      | HP-10  | 30.41 | 50580      |                                                          |
|      | HP-11  | 25.47 | 1056277    |                                                          |
|      | HP-12  | 26.73 | 486575     |                                                          |
|      | HP-13  | 21.33 | 13484734   |                                                          |
|      | HP-14  | 26    | 762395     |                                                          |
|      | HP-15  | 23.14 | 4428667    |                                                          |
|      | HP-16  | 29.43 | 92428      |                                                          |
|      | HP-17  | 16.55 | 255207167  |                                                          |
|      | N30-1  | 19.41 | 839812     | N30-1/HP-6,N30-2/HP-10,N30-3/HP-11,N30-4/HP-3,N30-5/HP-8 |
|      | N30-2  | 22.83 | 103363     |                                                          |
|      | N30-3  | 33.12 | 189        |                                                          |
|      | N30-4  | 30.36 | 1026       |                                                          |
|      | N30-5  | 16.32 | 5574541    |                                                          |
|      | HP-1   | 16.47 | 268081038  |                                                          |
|      | HP-2   | 21.01 | 16418569   |                                                          |
|      | HP-3   | 19.66 | 37671121   |                                                          |
|      | HP-4   | 15.36 | 530664045  |                                                          |
|      | HP-5   | 14.52 | 889689733  |                                                          |
|      | HP-6   | 16.32 | 293995649  |                                                          |
|      | HP-7   | 15.71 | 427869946  |                                                          |
|      | HP-8   | 15.99 | 360168292  |                                                          |
|      | HP-9   | 17.32 | 158918892  |                                                          |
|      | HP-10  | 17.85 | 114703819  |                                                          |
|      | HP-11  | 16.76 | 224278756  |                                                          |
|      | HP-12  | 19.36 | 45306255   |                                                          |
|      | HP-13  | 26.35 | 614713     |                                                          |
|      | HP-14  | 21.36 | 13238153   |                                                          |
|      | N30-1  | 19.31 | 892863     |                                                          |
|      | N30-2  | 18.66 | 1329545    |                                                          |
|      | N30-3  | 19.98 | 592306     |                                                          |
|      | N30-4  | 21.34 | 257482     |                                                          |
|      | N30-5  | 30.06 | 1233       |                                                          |
|      | N30-6  | 30.41 | 995        |                                                          |
|      | N30-7  | 18.72 | 1281567    |                                                          |
|      | N30-8  | 21.39 | 249716     |                                                          |
|      | N30-9  | 31.14 | 636        |                                                          |
| 2022 | N30-10 | 19.34 | 876605     |                                                          |
|      | N30-11 | 19    | 1079577    |                                                          |
|      | HP-1   | 18.06 | 100802929  |                                                          |
|      | HP-2   | 14.32 | 1006170671 |                                                          |
|      | HP-3   | 19.36 | 45306255   |                                                          |
|      | HP-4   | 15.62 | 452227185  |                                                          |
|      | HP-5   | 16.32 | 293995649  |                                                          |
|      | HP-6   | 17.91 | 110547253  |                                                          |
|      | HP-7   | 21.39 | 12996082   |                                                          |
|      | HP-8   | 19.34 | 45867120   |                                                          |
|      | HP-9   | 20.68 | 20114066   |                                                          |
|      | HP-10  | 24.63 | 1770911    |                                                          |

---

|       |       |           |
|-------|-------|-----------|
| HP-11 | 14.96 | 678712446 |
| HP-12 | 22.74 | 5664208   |
| HP-13 | 30.58 | 45558     |
| HP-14 | 16.98 | 195889770 |
| HP-15 | 17.83 | 116123786 |
| HP-16 | 29.37 | 95903     |
| HP-17 | 17.93 | 109195477 |
| HP-18 | 19.6  | 39087552  |
| HP-19 | 18.4  | 81778082  |
| HP-20 | 19.81 | 34350554  |
| HP-21 | 21.03 | 16217802  |
| N34-1 | 19.68 | 26415     |
| N34-2 | 18.2  | 73277     |
| N34-3 | 20.32 | 16992     |
| N34-4 | 16.74 | 200491    |

---

Note: N34:NADC34-like-PRRSV; N30:NADC30-like-PRRSV; HP:HP-PRRSV. The conversion of Ct values and virus copies of HP PRRSV, and NADC30-like-PRRSV was referred to the reference [21].
